# Supplementary material
Source: publisher figshare collection journal article supplement (https://asha.figshare.com/articles/dataset/_/14110454)
Supplement: Supplementary file 1 [file 1]

**Supplemental Material S1. Participants’ sex and age at each scan.**

| Subject ID | Scan # | Sex | Age (Years) | Subject ID | Scan # | Sex | Age (Years) |
|------------|--------|-----|-------------|------------|--------|-----|-------------|
| NF101      | 1      | F   | 7.0         | SF103      | 1      | F   | 8.1         |
| NF102      | 1      | F   | 9.8         | SF103      | 2      | F   | 8.9         |
| NF102      | 2      | F   | 11.5        | SF103      | 3      | F   | 9.9         |
| NF103      | 1      | F   | 7.9         | SF103      | 4      | F   | 10.9        |
| NF103      | 2      | F   | 8.8         | SF107      | 1      | F   | 10.3        |
| NF103      | 3      | F   | 9.7         | SF107      | 2      | F   | 11.5        |
| NF103      | 4      | F   | 10.8        | SF107      | 4      | F   | 15.0        |
| NF106      | 1      | F   | 6.1         | SF113      | 1      | F   | 7.9         |
| NF106      | 2      | F   | 6.8         | SF113      | 2      | F   | 9.2         |
| NF106      | 3      | F   | 7.7         | SF113      | 3      | F   | 10.0        |
| NF108      | 1      | F   | 7.8         | SF113      | 4      | F   | 10.9        |
| NF108      | 2      | F   | 8.8         | SF117      | 3      | F   | 6.3         |
| NF109      | 1      | F   | 4.2         | SF117      | 4      | F   | 7.2         |
| NF109      | 2      | F   | 5.1         | SF119      | 1      | F   | 9.6         |
| NF109      | 3      | F   | 6.1         | SF119      | 2      | F   | 10.7        |
| NF109      | 4      | F   | 7.0         | SF119      | 3      | F   | 11.6        |
| NF111      | 1      | F   | 6.8         | SF119      | 4      | F   | 12.5        |
| NF111      | 2      | F   | 7.6         | SF122      | 1      | F   | 5.2         |
| NF111      | 3      | F   | 8.6         | SF122      | 2      | F   | 6.3         |
| NF111      | 4      | F   | 9.4         | SF122      | 3      | F   | 7.1         |
| NF112      | 1      | F   | 4.3         | SF124      | 1      | F   | 3.9         |
| NF112      | 2      | F   | 5.2         | SF124      | 2      | F   | 4.9         |
| NF112      | 3      | F   | 6.1         | SF124      | 3      | F   | 6.1         |
| NF112      | 4      | F   | 6.8         | SF126      | 2      | F   | 6.3         |
| NF113      | 1      | F   | 9.4         | SM101      | 1      | M   | 8.8         |
| NF113      | 2      | F   | 10.2        | SM101      | 2      | M   | 9.9         |
| NF113      | 3      | F   | 11.2        | SM101      | 3      | M   | 11.2        |
| NF114      | 1      | F   | 10.1        | SM102      | 1      | M   | 9.6         |
| NF114      | 3      | F   | 12.0        | SM102      | 2      | M   | 10.7        |
| NF115      | 1      | F   | 4.0         | SM102      | 3      | M   | 11.9        |
| NF115      | 2      | F   | 4.8         | SM102      | 4      | M   | 13.0        |
| NF115      | 3      | F   | 5.7         | SM104      | 1      | M   | 4.9         |
| NF115      | 4      | F   | 6.5         | SM104      | 2      | M   | 6.7         |
| NF116      | 1      | F   | 6.9         | SM104      | 3      | M   | 8.0         |
| NF116      | 2      | F   | 7.8         | SM104      | 4      | M   | 8.9         |
| NF117      | 2      | F   | 6.5         | SM110      | 1      | M   | 5.4         |
| NF117      | 3      | F   | 7.5         | SM110      | 2      | M   | 6.4         |
| NF117      | 4      | F   | 8.3         | SM111      | 1      | M   | 7.7         |
| NF118      | 1      | F   | 5.7         | SM111      | 2      | M   | 8.7         |
| NF118      | 2      | F   | 6.6         | SM114      | 1      | M   | 3.6         |
| NF118      | 3      | F   | 7.5         | SM114      | 2      | M   | 4.4         |
| NF118      | 4      | F   | 8.3         | SM114      | 3      | M   | 5.3         |
| NF119      | 1      | F   | 4.2         | SM114      | 4      | M   | 6.4         |
| NF119      | 2      | F   | 6.3         | SM117      | 1      | M   | 5.6         |
| NF119      | 3      | F   | 7.3         | SM117      | 2      | M   | 6.9         |
| NF119      | 4      | F   | 8.1         | SM117      | 3      | M   | 8.1         |
| NF120      | 1      | F   | 9.9         | SM117      | 4      | M   | 9.1         |
| NF120      | 2      | F   | 10.7        | SM123      | 1      | M   | 6.3         |

| Subject ID | Scan # | Sex | Age (Years) |
|------------|--------|-----|-------------|
| NF121      | 1      | F   | 3.6         |
| NF121      | 2      | F   | 4.5         |
| NF122      | 1      | F   | 6.5         |
| NF122      | 2      | F   | 7.5         |
| NF122      | 4      | F   | 9.3         |
| NF124      | 1      | F   | 7.5         |
| NF124      | 2      | F   | 8.4         |
| NF127      | 1      | F   | 7.1         |
| NF128      | 1      | F   | 9.2         |
| NF128      | 2      | F   | 9.9         |
| NF128      | 3      | F   | 10.6        |
| NF128      | 4      | F   | 11.6        |
| NF129      | 1      | F   | 4.3         |
| NF129      | 3      | F   | 6.2         |
| NF130      | 1      | F   | 7.3         |
| NM102      | 1      | M   | 7.2         |
| NM102      | 2      | M   | 8.0         |
| NM102      | 3      | M   | 9.0         |
| NM105      | 1      | M   | 4.1         |
| NM105      | 2      | M   | 4.9         |
| NM105      | 3      | M   | 5.7         |
| NM105      | 4      | M   | 6.7         |
| NM106      | 1      | M   | 6.1         |
| NM106      | 2      | M   | 6.7         |
| NM106      | 3      | M   | 7.7         |
| NM107      | 1      | M   | 8.4         |
| NM107      | 2      | M   | 9.1         |
| NM107      | 3      | M   | 9.9         |
| NM107      | 4      | M   | 11.2        |
| NM108      | 1      | M   | 5.8         |
| NM108      | 2      | M   | 6.6         |
| NM108      | 3      | M   | 7.6         |
| NM108      | 4      | M   | 8.4         |
| NM109      | 1      | M   | 8.6         |
| NM109      | 2      | M   | 9.5         |
| NM109      | 3      | M   | 10.6        |
| NM110      | 1      | M   | 5.3         |
| NM110      | 2      | M   | 6.1         |
| NM110      | 3      | M   | 7.1         |
| NM110      | 4      | M   | 7.9         |
| NM111      | 1      | M   | 9.0         |
| NM111      | 2      | M   | 9.8         |
| NM111      | 3      | M   | 10.8        |
| NM111      | 4      | M   | 11.8        |
| NM112      | 1      | M   | 4.8         |
| NM112      | 2      | M   | 5.8         |
| NM112      | 3      | M   | 7.0         |
| NM112      | 4      | M   | 8.0         |
| NM114      | 1      | M   | 5.0         |
| NM114      | 2      | M   | 5.8         |

| Subject ID | Scan # | Sex | Age (Years) |
|------------|--------|-----|-------------|
| SM123      | 2      | M   | 7.1         |
| SM123      | 3      | M   | 7.9         |
| SM123      | 4      | M   | 8.7         |
| SM124      | 1      | M   | 6.3         |
| SM124      | 2      | M   | 7.3         |
| SM124      | 3      | M   | 8.6         |
| SM130      | 1      | M   | 8.4         |
| SM130      | 2      | M   | 9.5         |
| SM130      | 3      | M   | 10.6        |
| SM130      | 4      | M   | 11.5        |
| SM133      | 1      | M   | 3.8         |
| SM133      | 2      | M   | 5.0         |
| SM133      | 3      | M   | 5.9         |
| SM133      | 4      | M   | 6.7         |
| SM136      | 1      | M   | 5.2         |
| SM136      | 2      | M   | 5.9         |
| SM136      | 3      | M   | 7.2         |
| SM140      | 1      | M   | 3.7         |
| SM140      | 2      | M   | 4.9         |
| SM140      | 3      | M   | 5.7         |
| SM140      | 4      | M   | 6.7         |
| SM141      | 1      | M   | 5.3         |
| SM141      | 2      | M   | 6.3         |
| SM141      | 3      | M   | 7.4         |
| SM143      | 1      | M   | 4.9         |
| SM143      | 3      | M   | 6.3         |
| SM143      | 3      | M   | 7.2         |
| SM144      | 1      | M   | 7.3         |
| SM144      | 2      | M   | 8.5         |
| SM144      | 3      | M   | 9.7         |
| SM144      | 4      | M   | 10.8        |
| SM145      | 1      | M   | 6.8         |
| SM145      | 2      | M   | 7.8         |
| SM145      | 3      | M   | 8.7         |
| SM145      | 4      | M   | 9.9         |
| SM147      | 1      | M   | 7.2         |
| SM147      | 2      | M   | 7.9         |
| SM147      | 3      | M   | 8.8         |
| SM147      | 4      | M   | 9.8         |

| Subject ID | Scan # | Sex | Age (Years) |
|------------|--------|-----|-------------|
| NM114      | 3      | M   | 6.6         |
| NM115      | 1      | M   | 5.0         |
| NM115      | 2      | M   | 5.8         |
| NM115      | 3      | M   | 6.6         |
| NM116      | 1      | M   | 6.0         |
| NM116      | 2      | M   | 6.8         |
| NM116      | 3      | M   | 7.6         |
| NM116      | 4      | M   | 8.3         |
| NM117      | 1      | M   | 8.4         |
| NM117      | 2      | M   | 10.6        |
| NM117      | 3      | M   | 11.5        |
| NM117      | 4      | M   | 12.5        |
| NM118      | 1      | M   | 3.7         |
| NM118      | 2      | M   | 4.5         |
| NM118      | 3      | M   | 5.5         |
| NM118      | 4      | M   | 6.4         |
| NM119      | 1      | M   | 5.4         |
| NM119      | 2      | M   | 6.2         |
| NM119      | 3      | M   | 7.1         |
| NM119      | 4      | M   | 8.1         |
| NM121      | 1      | M   | 8.4         |
| NM121      | 2      | M   | 9.2         |
| NM121      | 3      | M   | 10.0        |
| NM121      | 4      | M   | 11.0        |
| NM123      | 1      | M   | 5.0         |
| NM123      | 2      | M   | 6.0         |
| NM123      | 3      | M   | 6.8         |
| NM123      | 4      | M   | 7.8         |
| NM124      | 1      | M   | 6.4         |
| NM124      | 2      | M   | 7.4         |
| NM124      | 3      | M   | 8.2         |
| NM124      | 4      | M   | 9.1         |
| NM125      | 1      | M   | 3.3         |
| NM125      | 2      | M   | 4.2         |
| NM125      | 3      | M   | 4.9         |
| NM127      | 1      | M   | 10.8        |
| NM127      | 2      | M   | 11.7        |
| NM128      | 1      | M   | 4.5         |
| NM128      | 2      | M   | 5.4         |
| NM128      | 3      | M   | 6.4         |
| NM128      | 4      | M   | 7.4         |
