# Supplementary material
Source: publisher figshare collection journal article supplement (https://asha.figshare.com/articles/dataset/_/14110454)
Supplement: Supplementary file 2 [file 1]

**Supplemental Material S2.** Gray matter volume (GMV) differences in terms of absolute t-statistics ( $|t\text{-stat}|$ ) and  $^{18}\text{F}$ -fluorodeoxyglucose (FDG) uptake ( $\mu\text{mol/g/min}$ ) in each region.

|                                           | Left hemisphere       |       | Right hemisphere      |       |
|-------------------------------------------|-----------------------|-------|-----------------------|-------|
|                                           | GMV $ t\text{-stat} $ | FDG   | GMV $ t\text{-stat} $ | FDG   |
| <i>Frontal Regions</i>                    |                       |       |                       |       |
| Frontal pole                              | 1.052                 | 0.311 | 1.116                 | 0.303 |
| Insular Cortex                            | 0.797                 | 0.259 | 0.593                 | 0.274 |
| Superior Frontal Gyrus                    | 0.748                 | 0.319 | 1.016                 | 0.321 |
| Middle Frontal Gyrus                      | 1.382                 | 0.343 | 0.935                 | 0.346 |
| Inferior Frontal Gyrus. pars triangularis | 0.723                 | 0.319 | 1.077                 | 0.323 |
| Inferior Frontal Gyrus. pars opercularis  | 0.652                 | 0.323 | 0.911                 | 0.339 |
| Precentral Gyrus                          | 0.869                 | 0.303 | 0.867                 | 0.306 |
| Frontal Medial Cortex                     | 0.628                 | 0.316 | 0.636                 | 0.304 |
| Supplementary Motor Cortex                | 0.972                 | 0.319 | 1.001                 | 0.317 |
| Frontal Orbital Cortex                    | 0.855                 | 0.280 | 0.966                 | 0.283 |
| Frontal Operculum Cortex                  | 1.189                 | 0.322 | 0.490                 | 0.325 |
| Central Opercular Cortex                  | 1.161                 | 0.291 | 0.480                 | 0.293 |
| Subcallosal Cortex                        | 0.862                 | 0.247 | 0.942                 | 0.246 |
| <i>Medial Temporal lobe</i>               |                       |       |                       |       |
| Parahippocampal Gyrus. anterior           | 1.169                 | 0.187 | 2.333                 | 0.204 |
| Parahippocampal Gyrus. posterior          | 0.394                 | 0.214 | 0.685                 | 0.221 |
| Temporal Fusiform Cortex. anterior        | 1.163                 | 0.228 | 1.418                 | 0.228 |
| Temporal Fusiform Cortex. posterior       | 0.585                 | 0.256 | 0.717                 | 0.253 |
| Temporal Occipital Fusiform Cortex        | 0.619                 | 0.289 | 0.723                 | 0.285 |
| Planum Polare                             | 0.593                 | 0.231 | 0.713                 | 0.246 |
| Heschls Gyrus (includes H1 and H2)        | 0.805                 | 0.337 | 0.869                 | 0.340 |
| Planum Temporale                          | 0.597                 | 0.294 | 0.676                 | 0.335 |
| <i>Lateral Temporal lobe</i>              |                       |       |                       |       |
| Superior Temporal Gyrus. anterior         | 0.720                 | 0.271 | 0.802                 | 0.260 |
| Superior Temporal Gyrus. posterior        | 0.735                 | 0.294 | 1.102                 | 0.285 |
| Middle Temporal Gyrus. anterior           | 0.718                 | 0.275 | 1.014                 | 0.260 |
| Middle Temporal Gyrus. posterior          | 0.596                 | 0.300 | 0.943                 | 0.295 |
| Middle Temporal Gyrus. temporooccipital   | 0.578                 | 0.301 | 0.704                 | 0.311 |
| Inferior Temporal Gyrus. anterior         | 0.555                 | 0.264 | 1.291                 | 0.256 |
| Inferior Temporal Gyrus. posterior        | 0.853                 | 0.272 | 0.992                 | 0.274 |
| Inferior Temporal Gyrus. temporooccipital | 0.887                 | 0.291 | 0.595                 | 0.290 |
| Temporal Pole                             | 0.636                 | 0.218 | 0.669                 | 0.208 |
| <i>Parietal Lobe</i>                      |                       |       |                       |       |
| Postcentral Gyrus                         | 1.534                 | 0.292 | 0.927                 | 0.296 |

|                                    | Left hemisphere |       | Right hemisphere |       |
|------------------------------------|-----------------|-------|------------------|-------|
|                                    | GMV  t-stat     | FDG   | GMV  t-stat      | FDG   |
| Superior Parietal Lobule           | 1.519           | 0.296 | 0.894            | 0.295 |
| Supramarginal Gyrus. anterior      | 1.400           | 0.300 | 1.480            | 0.291 |
| Supramarginal Gyrus. posterior     | 0.848           | 0.315 | 0.792            | 0.310 |
| Angular Gyrus                      | 0.725           | 0.325 | 0.894            | 0.331 |
| Precuneous Cortex                  | 1.056           | 0.352 | 0.856            | 0.335 |
| Parietal Operculum Cortex          | 0.929           | 0.293 | 0.713            | 0.311 |
| <i>Occipital Lobe</i>              |                 |       |                  |       |
| Lateral Occipital Cortex. superior | 0.874           | 0.310 | 0.989            | 0.319 |
| Lateral Occipital Cortex. inferior | 0.782           | 0.296 | 0.831            | 0.309 |
| Intracalcarine Cortex              | 0.752           | 0.378 | 0.850            | 0.357 |
| Cuneal Cortex                      | 0.810           | 0.334 | 0.504            | 0.333 |
| Lingual Gyrus                      | 0.863           | 0.298 | 0.899            | 0.302 |
| Occipital Fusiform Gyrus           | 0.576           | 0.309 | 1.010            | 0.306 |
| Supracalcarine Cortex              | 0.970           | 0.377 | 0.621            | 0.380 |
| Occipital Pole                     | 1.060           | 0.292 | 0.687            | 0.316 |
| <i>Cingulate</i>                   |                 |       |                  |       |
| Paracingulate Gyrus                | 1.109           | 0.329 | 0.922            | 0.326 |
| Cingulate Gyrus. anterior          | 0.874           | 0.266 | 1.082            | 0.261 |
| Cingulate Gyrus. posterior         | 1.072           | 0.348 | 0.775            | 0.315 |
| <i>Subcortical</i>                 |                 |       |                  |       |
| Caudate                            | 0.335           | 0.253 | 0.349            | 0.263 |
| Putamen                            | 0.604           | 0.310 | 0.659            | 0.328 |
| Pallidum                           | 0.474           | 0.198 | 0.484            | 0.226 |
| Hippocampus                        | 0.574           | 0.213 | 1.062            | 0.206 |
| Amygdala                           | 0.566           | 0.190 | 0.765            | 0.191 |
| Accumbens                          | 0.492           | 0.274 | 0.819            | 0.286 |
